# Supplementary material for: Measurement of hepatitis B virus DNA in fresh versus processed dentin from chronically infected patients
Source: Springer Nature journal article supplement (doi:10.1186/s12967-018-1719-9), 2018-12-01
Supplement: MOESM1 [file 16336896]

## Additional files

### Additional file 1. Key resources in HBV DNA measurement

| Reagent or Resource                                                                   | Source                 | Identifier                                                                                                                                                                                                                                                                                    |
|---------------------------------------------------------------------------------------|------------------------|-----------------------------------------------------------------------------------------------------------------------------------------------------------------------------------------------------------------------------------------------------------------------------------------------|
| <b>Reagents</b>                                                                       |                        |                                                                                                                                                                                                                                                                                               |
| Proteinase K                                                                          | Ambion                 | Cat#AM2546                                                                                                                                                                                                                                                                                    |
| Phenol:Chloroform:Isoamyl Alcohol 25:24:1, Saturated with 10mM Tris, pH 8.0, 1mM EDTA | Sigma                  | Cat#P3803                                                                                                                                                                                                                                                                                     |
| <b>Critical commercial assays</b>                                                     |                        |                                                                                                                                                                                                                                                                                               |
| TBONE EX Kit                                                                          | DNA Chip Research Inc. | Cat#TBEW200                                                                                                                                                                                                                                                                                   |
| QIAamp DNA Investigator Kit                                                           | Qiagen                 | Cat#56504                                                                                                                                                                                                                                                                                     |
| Lyophilised 2X qPCR MasterMix                                                         | Primerdesign Ltd.      | Cat#oasig-standard-150                                                                                                                                                                                                                                                                        |
| Real-time PCR detection kit for Hepatitis B Virus                                     | MyBiosource Inc.       | Cat#MBS486092                                                                                                                                                                                                                                                                                 |
| <b>Software</b>                                                                       |                        |                                                                                                                                                                                                                                                                                               |
| SDS 2.4.1                                                                             | Applied Biosystems     | <a href="https://www.thermofisher.com/kr/ko/home/technical-resources/software-downloads/applied-biosystems-7900ht-fast-real-timespcr-system.html">https://www.thermofisher.com/kr/ko/home/technical-resources/software-downloads/applied-biosystems-7900ht-fast-real-timespcr-system.html</a> |
